# Supplementary material for: Facile one-pot synthesis of VxOy@C catalysts using sucrose for the direct hydroxylation of benzene to phenol
Source: Royal Society of Chemistry journal article supplement (doi:10.1039/c3gc00084b), 2013-01-01
Supplement: c3gc00084b.pdf [file c3gc00084b.pdf]

## Supporting information

# Facile One-pot Synthesis of $V_xO_y@C$ Catalysts Using Sucrose for Direct Hydroxylation of Benzene to Phenol

Weitao Wang, Guodong Ding, Tao Jiang\*, Peng Zhang, Tianbin Wu and Buxing Han\*

*Beijing National Laboratory for Molecular Sciences (BNLMS), Centre for Molecular Science, Institute of Chemistry, Chinese Academy of Sciences, Beijing 100190, China. Tel./fax: +86 10 62562821. E-mail addresses: Jiangt@iccas.ac.cn (Tao Jiang); Hanbx@iccas.ac.cn (Buxing Han).*

Table S1 The V 2P<sub>3/2</sub> of  $V_xO_y@C$  catalysts.

| Entry | Catalysts             | V 2P <sub>3/2</sub> |
|-------|-----------------------|---------------------|
| 1     | $V_xO_y@C$ -0.293-120 | 516.5               |
| 2     | $V_xO_y@C$ -0.195-120 | 516.9               |
| 3     | $V_xO_y@C$ -0.098-120 | 516.9               |
| 4     | $V_xO_y@C$ -0.05-120  | 516.0               |
| 5     | $V_xO_y@C$ -0.025-120 | 515.5               |

Table S2 Catalytic performances of the  $V_xO_y@C$  catalysts prepared from different V precursors

| Entry | Catalysts      | V% (ICP) | V 2P <sub>3/2</sub> | Phenol selectivity [%] | Phenol yield [%] |
|-------|----------------|----------|---------------------|------------------------|------------------|
| 1     | $V_xO_y@C$ -Cl | 0.91     | ---- <sup>a</sup>   | 96.6                   | 5.9              |
| 2     | $V_xO_y@C$ -A  | 4.19     | 516.7               | 91.6                   | 8.9              |

Reaction conditions: catalyst, 25 mg; ascorbic acid, 0.8 g; acetonitrile, 2.0 g; benzene, 1.0 mL; O<sub>2</sub> pressure, 3.0 MPa; temperature, 80 °C, time, 10 h.

<sup>a</sup> The V content was too low to be detected.

The vanadium content (4.19 wt%) and vanadium species (516.7 eV) of the  $V_xO_y@C$ -A detected from the XPS were similar to those of the  $V_xO_y@C$ -0.195-120 (Table 2 entry 2, 4.38 wt%; Table S1 entry 2, 516.9 eV). Therefore, the yield of phenol over the  $V_xO_y@C$ -A (8.9%) was similar to that over  $V_xO_y@C$ -0.195-120 (Table 2, 9.2%). The low vanadium content of the  $V_xO_y@C$ -Cl (0.91 wt%) was the main reason for that  $V_xO_y@C$ -Cl gave the low yield of phenol (5.9%).

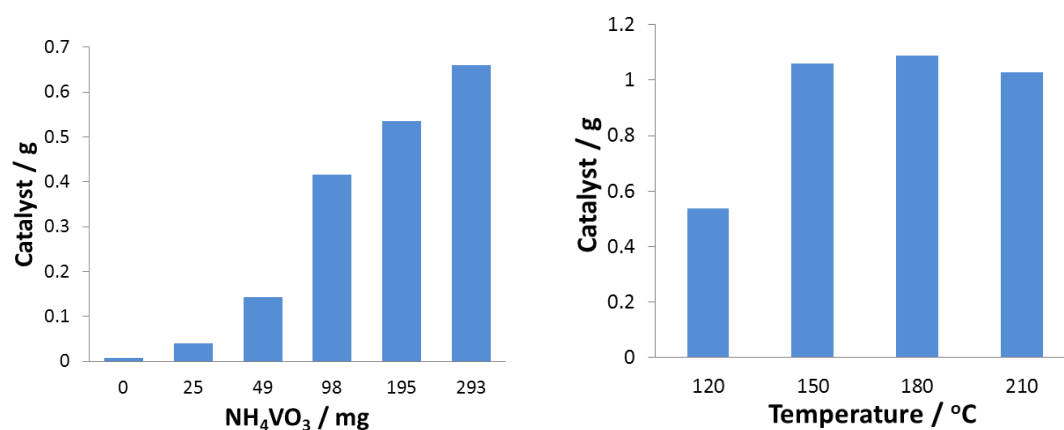

Fig. S1 The dependence of amount of catalysts obtained on the amount of  $\text{NH}_4\text{VO}_3$  and the hydrothermal temperature.

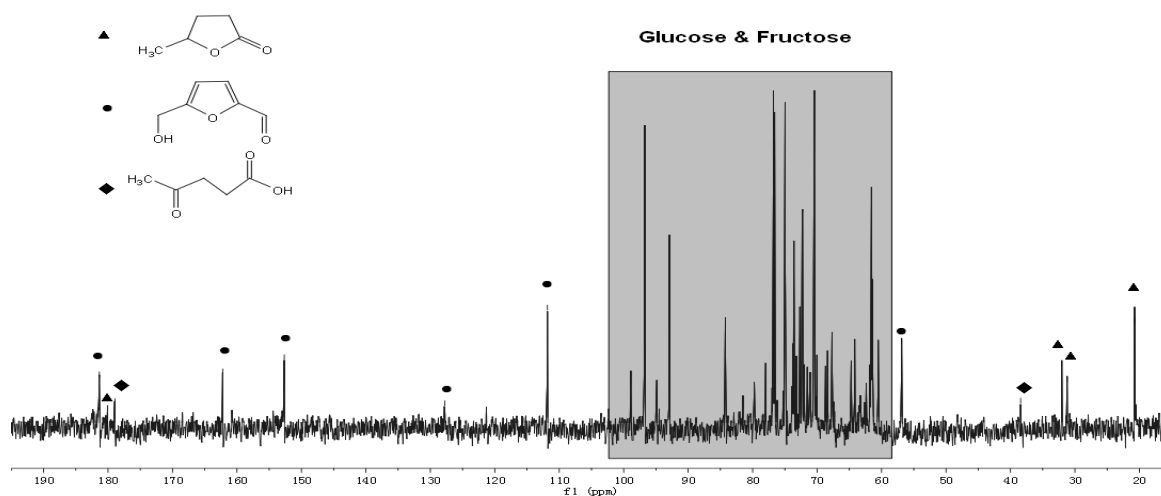

Fig. S2  $^{13}\text{C}$  NMR spectrum of the reaction solution of the hydrothermal process.

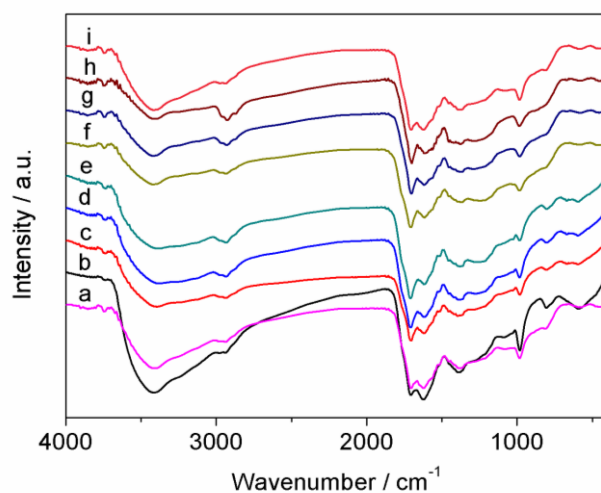

Fig. S3 FT-IR spectra of the catalysts

(a)  $V_xO_y@C$ -0.293-120, (b)  $V_xO_y@C$ -0.195-120, (c)  $V_xO_y@C$ -0.098-120, (d)  $V_xO_y@C$ -0.05-120, (e)  $V_xO_y@C$ -0.025-120, (f)  $V_xO_y@C$ -0.195-150, (g)  $V_xO_y@C$ -0.195-180, (h)  $V_xO_y@C$ -0.195-210, (i)  $V_xO_y@C$ -0.025-180.

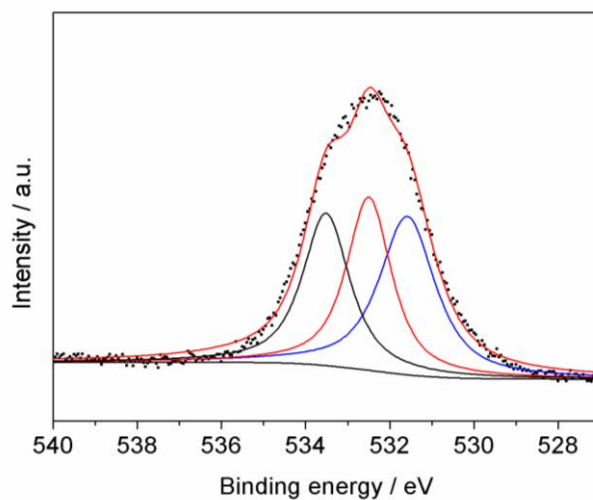

Fig. S4 O1s XPS spectrum of the  $V_xO_y@C$ -0.195-120.

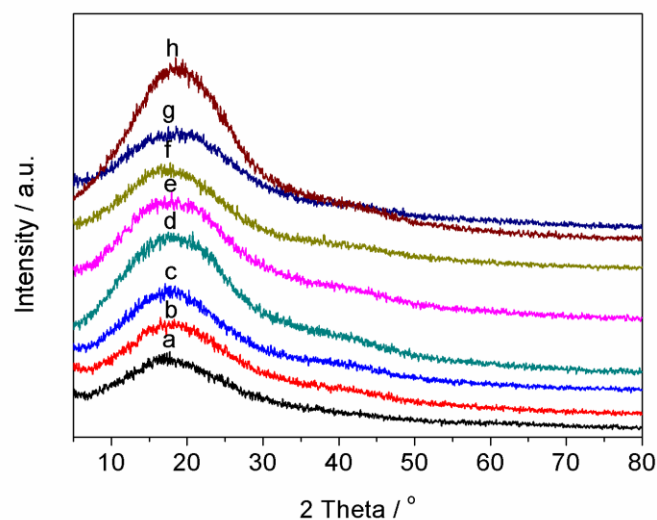

Fig. S5 XRD patterns of the catalysts

(a)  $V_xO_y@C-0.293-120$ , (b)  $V_xO_y@C-0.195-120$ , (c)  $V_xO_y@C-0.098-120$ ,  
(d)  $V_xO_y@C-0.025-120$ , (e)  $V_xO_y@C-0.195-150$ , (f)  $V_xO_y@C-0.195-180$ ,  
(g)  $V_xO_y@C-0.195-210$ , (h)  $V_xO_y@C-0.025-180$ .

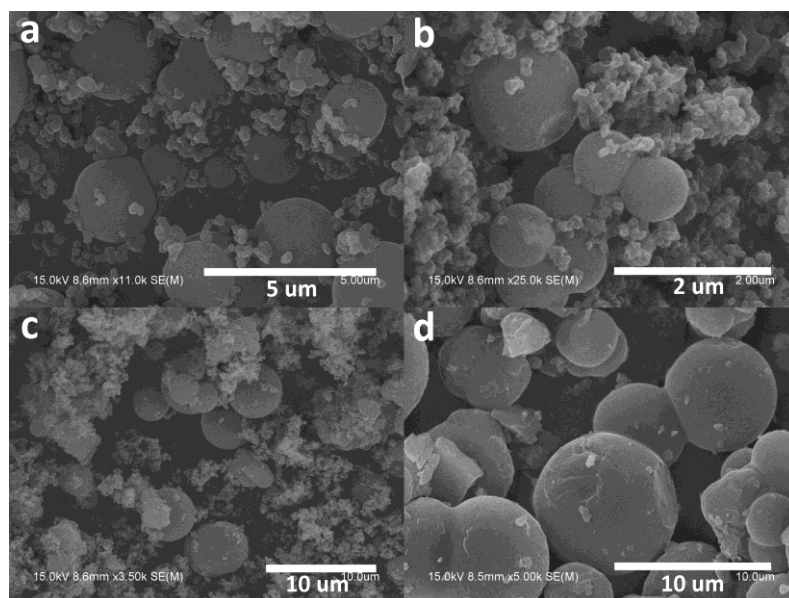

Fig. S6 The SEM images of  $V_xO_y@C$  catalysts. (a)  $V_xO_y@C-0.025-120$ , (b)  $V_xO_y@C-0.195-120$ ,  
(c)  $V_xO_y@C-0.195-180$ , (d)  $V_xO_y@C-0.025-180$ .

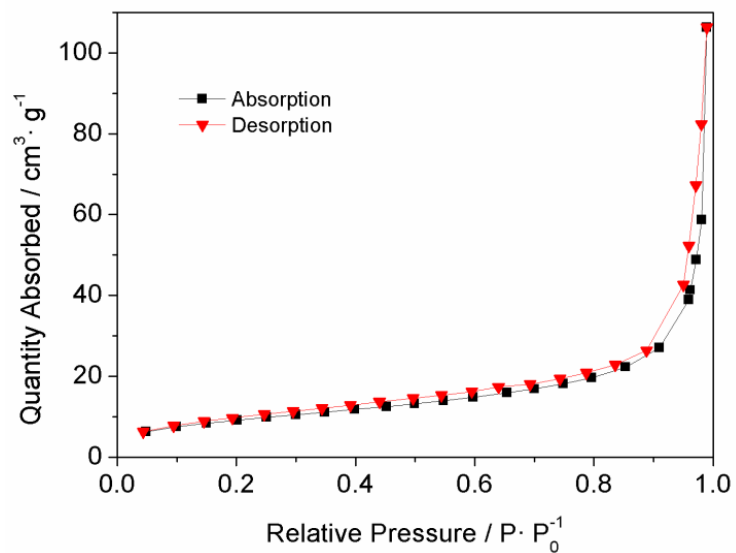

Fig. S7 Nitrogen adsorption-desorption isotherm of the  $V_xO_y@C-0.195-120$ .

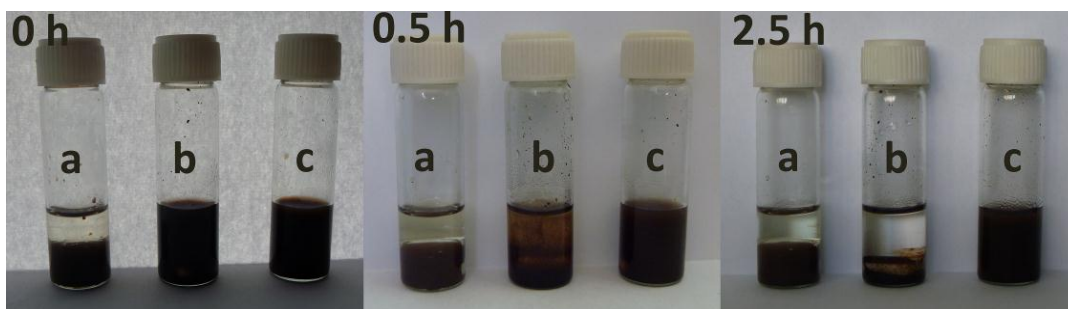

Fig. S8 The catalyst  $V_xO_y@C-0.195-120$  dispersion mixtures stood for 0 h, 0.5 h and 2.5 h after stirring.

a, water+benzene; b, benzene; c, acetonitrile+benzene

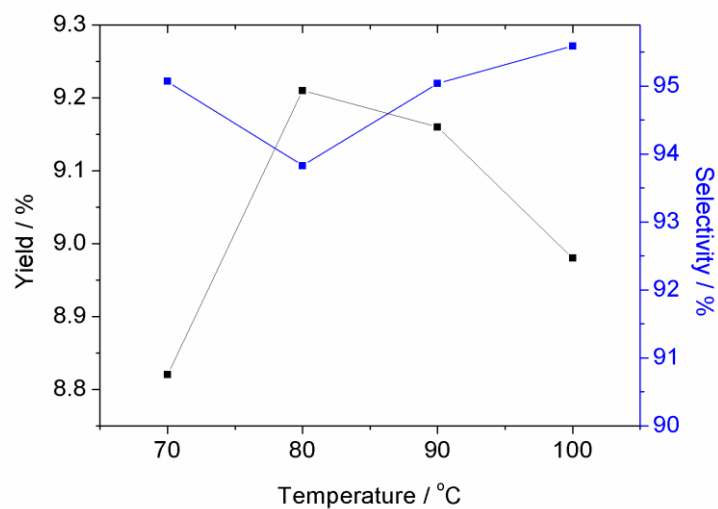

Fig. S9 The influence of reaction temperature on the hydroxylation of benzene to phenol over the  $V_xO_y@C-0.195-120$  catalyst.

Reaction conditions: catalyst, 25 mg; ascorbic acid, 0.8 g; acetonitrile, 2.0 g; benzene, 1.0 mL;  $O_2$  pressure, 3.0 MPa; reaction time, 10 h.

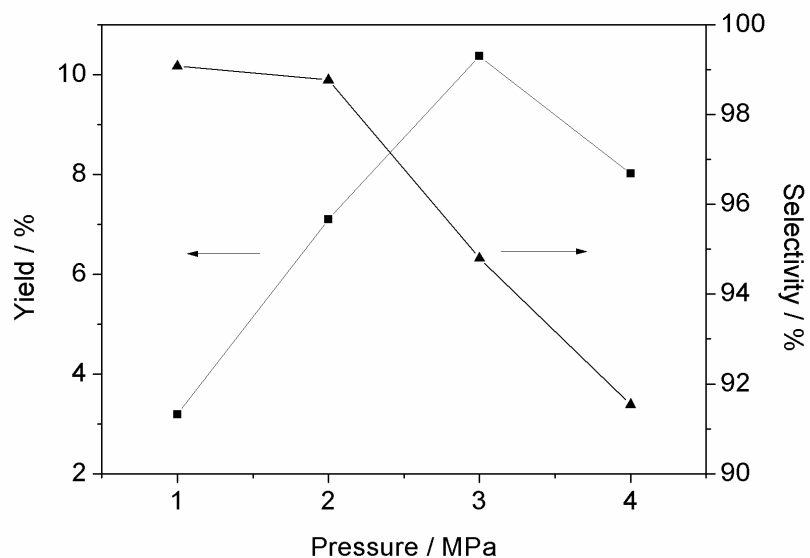

Fig. S10 The influence of oxygen pressure on the hydroxylation of benzene to phenol over the  $V_xO_y@C-0.195-120$  catalyst.

Reaction conditions: catalyst, 25 mg; ascorbic acid, 0.8 g; acetonitrile, 2.0 g; benzene, 1.0 mL; temperature, 80 °C, reaction time, 10 h.

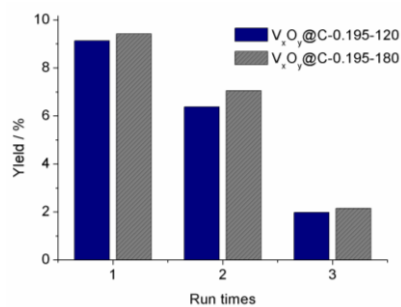

Fig. S11 Reuse of the catalysts for benzene hydroxylation

Reaction conditions: catalyst, 25 mg; ascorbic acid, 0.8 g; acetonitrile, 2.0 g; benzene, 1.0 mL;  $O_2$  pressure, 3.0 MPa; temperature, 80 °C; reaction time, 10 h.

The reuse results of the  $V_xO_y@C$  catalysts are shown in Fig. S11. It can be found that the activity of the catalysts gradually declined, which may be due to the leaching of V. The supported vanadium catalysts for oxidation usually faced the situation of V leaching. Further investigation is required to improve the stability of the catalysts.
